# Supplementary material for: Stearoyl-CoA desaturase inhibition blocks formation of hepatitis C virus-induced specialized membranes
Source: PubMed Central journal article supplement — Sci Rep. 2014 Apr 1;4:4549. doi: 10.1038/srep04549 (PMC4091094; doi:10.1038/srep04549), 2014-04-01
Supplement: srep04549-s1.pdf [file srep04549-s1.pdf]

# Stearoyl-CoA desaturase inhibition blocks formation of hepatitis C virus-induced specialized membranes

Rodney K. Lyn<sup>1,2</sup>, Rangunath Singaravelu<sup>1,3</sup>, Stacia Kargman<sup>4</sup>, Shifawn O'Hara<sup>1</sup>, Helen Chan<sup>4</sup>, Renata Oballa<sup>4</sup>, Zheng Huang<sup>4</sup>, Daniel M. Jones<sup>5</sup>, Andrew Ridsdale<sup>1</sup>, Rodney S. Russell<sup>5</sup>, Anthony Partridge<sup>4\*</sup> & John Paul Pezacki<sup>1,2,3\*</sup>

<sup>1</sup> National Research Council of Canada, Ottawa, Ontario, Canada.

<sup>2</sup> Department of Chemistry, and <sup>3</sup> Department of Biochemistry, Microbiology and Immunology, University of Ottawa, Ottawa, Canada.

<sup>4</sup> Merck Research Laboratories, Merck & Co., Kenilworth, N.J., USA.

<sup>5</sup> Immunology and Infectious Diseases, Faculty of Medicine, Memorial University of Newfoundland, St. John's, Newfoundland, Canada.

Current address for HC: Alexion Pharmaceuticals, Montreal, Canada; RO: Inception Sciences Canada Inc., Vancouver, Canada; ZH: Eli Lilly China Research & Development Center, Shanghai, China; AP: Pharmaron, Beijing, China.

Correspondence and requests for materials should be addressed to A.P. (Anthony.Partridge@pharmaron.com) or J.P.P. (John.Pezacki@nrc-cnrc.gc.ca).

# Supplementary Figure S1

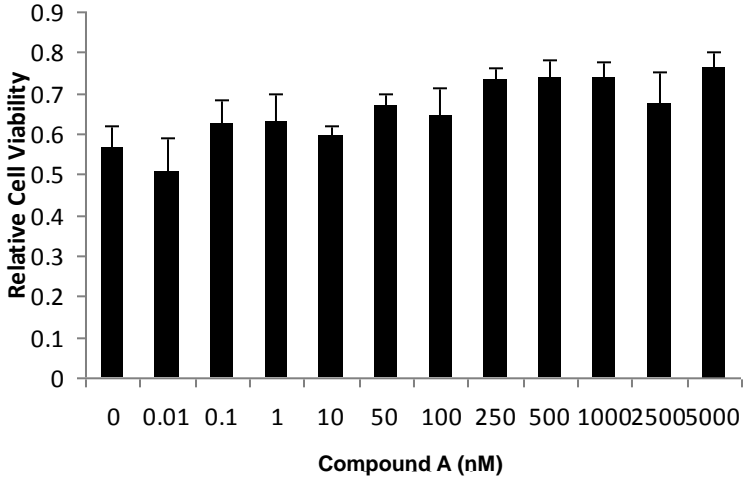

**Supplementary Figure S1: Cytotoxicity assay for inhibitor A.** The toxicity of inhibitor **A** was evaluated via an MTT assay following a 96 hour treatment in Huh7-SGR cells. Results confirm no significant cytotoxicity was observed at the concentrations tested.

# Supplementary Figure S2

**A**

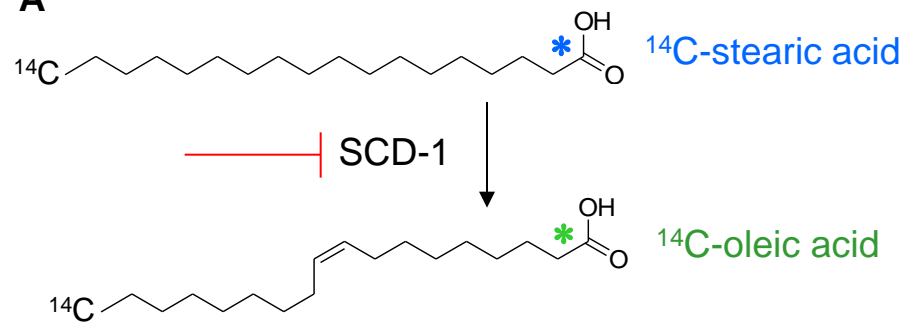

**B**

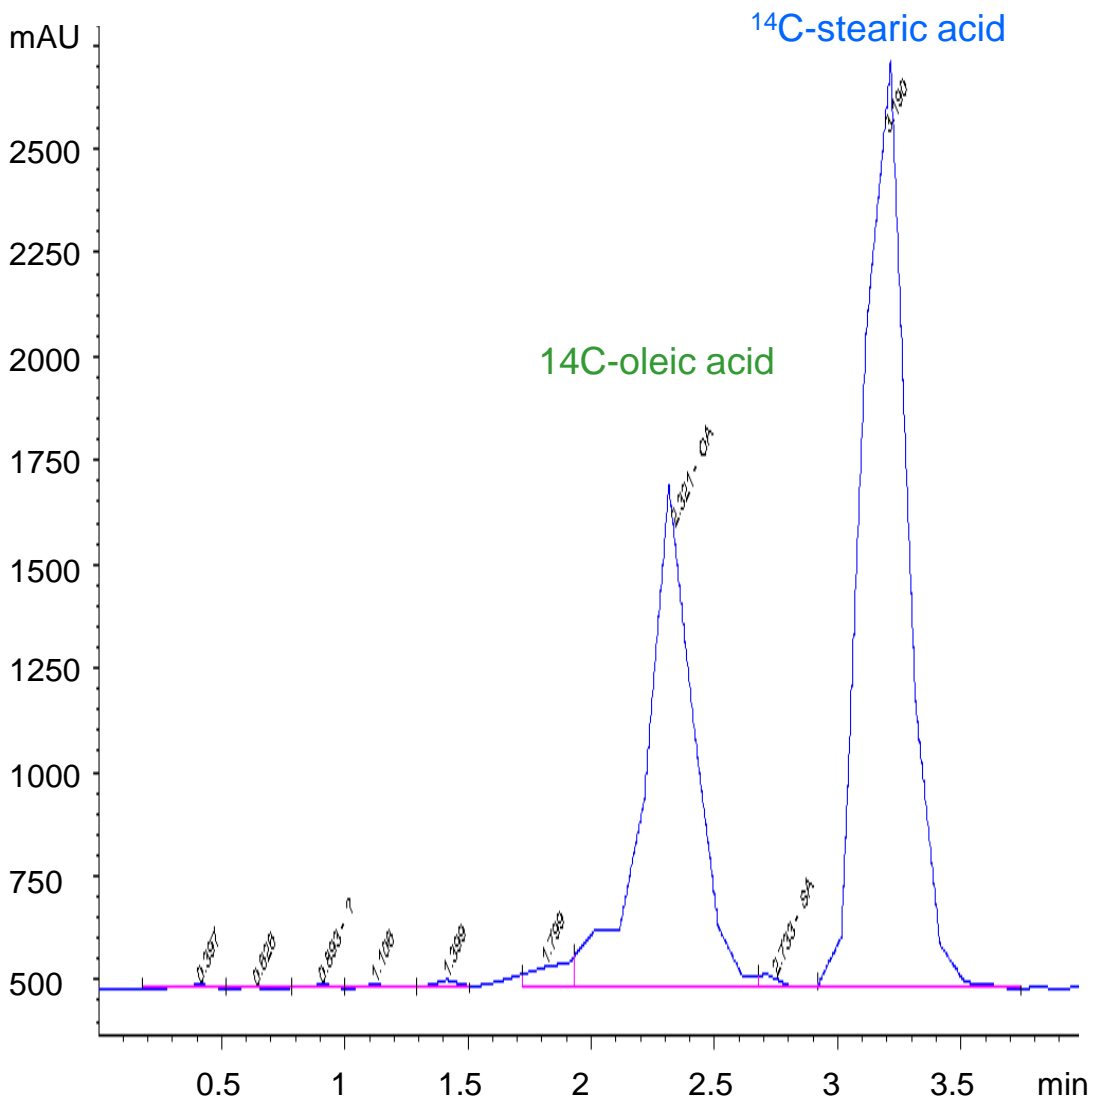

**Supplementary Figure S2: Measuring SCD-1 cell-based enzymatic activity by  $^{14}\text{C}$  labeling of stearic acid.** (a) SCD-1 enzymatic assays were performed by treatment of cells with  $^{14}\text{C}$  stearic acid. An organic extraction was performed to isolate lipids, and the conversion rate to  $^{14}\text{C}$  oleic acid was subsequently measured via reverse phase HPLC. Detection was performed using a scintillation analyzer. (b) An illustration of a typical chromatogram is shown.

# Supplementary Figure S3

**A**

Huh-7.5

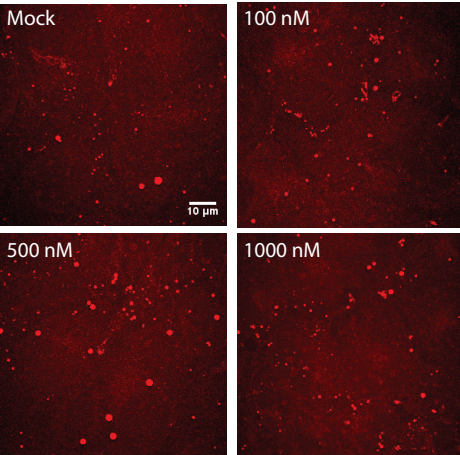

**B**

Huh-7.5 FGR

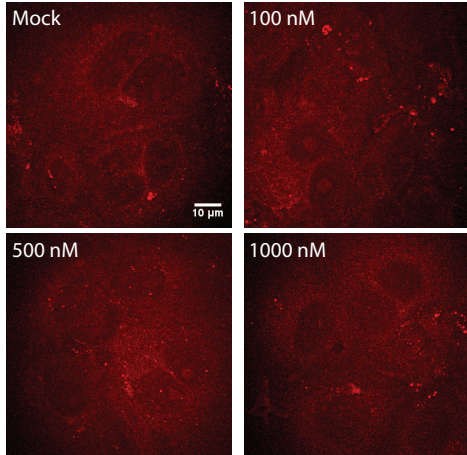

**C**

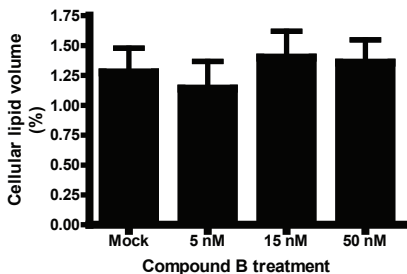

**D**

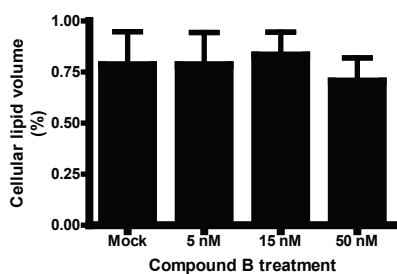

**Supplementary Figure S3: NS3 protease inhibitor has no effect on LD phenotype.** (a) Huh7.5 and (b) Huh7.5-FGR cells were treated with various concentrations of inhibitor **B**: 50nM, 15nM, and 5nM and non-treated (mock) of the inhibitor **B**. 96 hours post-treatment, cells were fixed and imaged by CARS microscopy. Representative images are shown for each concentrations (n=2). Scale bar = 10 $\mu$ m. The LD density was measured by voxel analysis under multiple field of views for (c) Huh7.5 cells (n>10) and (d) Huh7.5-FGR cells (n>10). The bar graphs illustrate the average cellular lipid volume measured by voxel analysis with error bars representing the standard error of the mean.

# Supplementary Figure S4

**A**

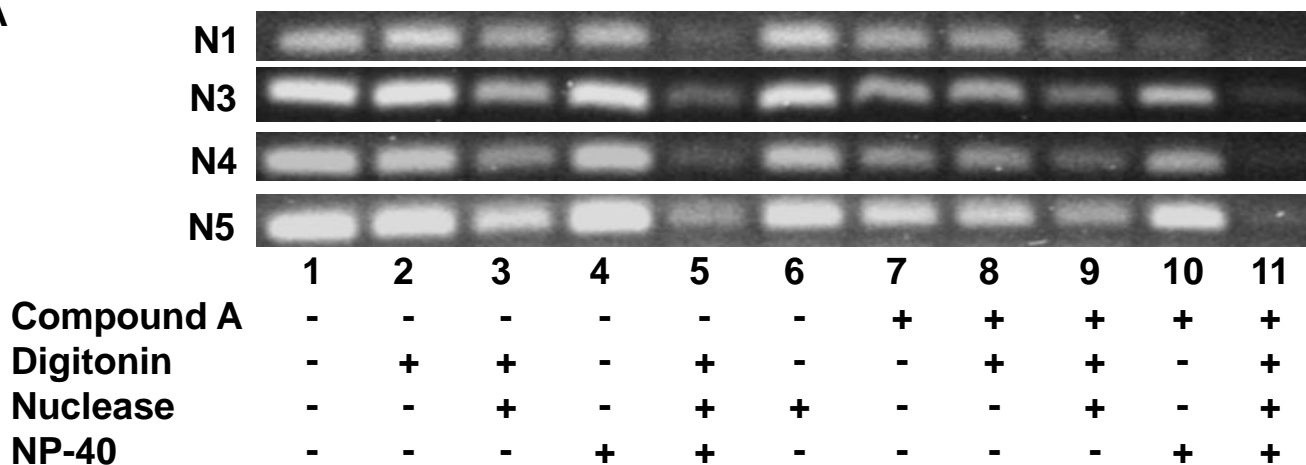

**B**

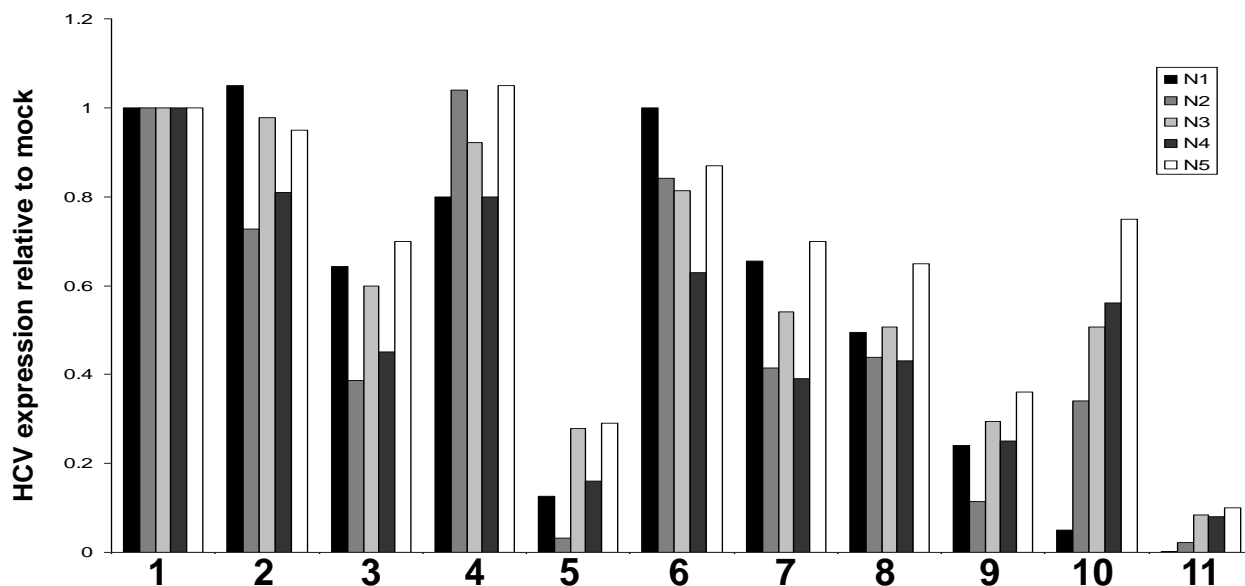

**C**

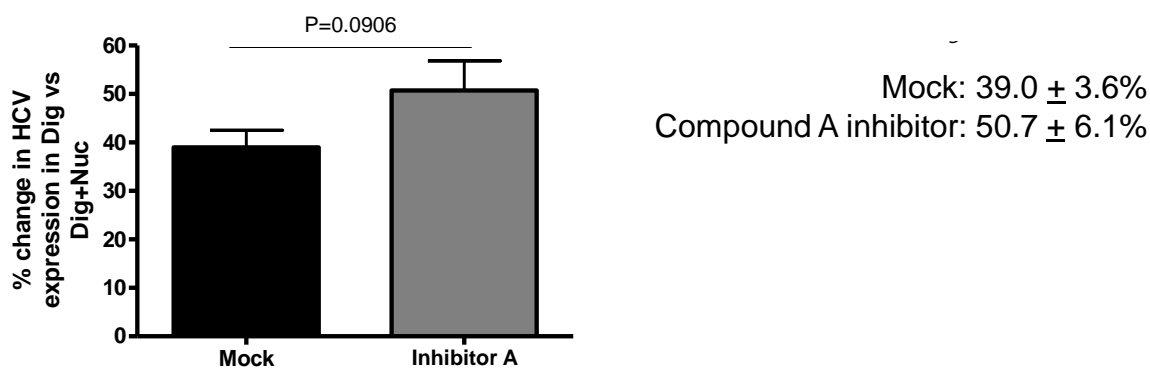

**Supplementary Figure S4: HCV RNA susceptibility to exogenously added nuclease after inhibiting SCD-1.** (a) Huh7-SGR cells were treated with vehicle (DMSO) (Lanes 1-6) or a concentration of inhibitor **A** yielding a 50% reduction in HCV RNA levels (Lanes 7-11) for 96 hours. RT-PCR was performed to illustrate the relative differences in HCV RNA abundance (n=4). The second trial (N2) was shown as a representative image in **Figure 2**. (b) The densitometry for each trial in (a) is quantified and individually shown. (c) The change in HCV RNA abundance between digitonin and digitonin + nuclease treatments for both mock and inhibitor **A** treated cells is shown. This graph demonstrates that SCD-1 inhibition with inhibitor **A** increases susceptibility of HCV RNA to exogenously added nucleases in digitonin permeabilized cells.

# Supplementary Figure S5

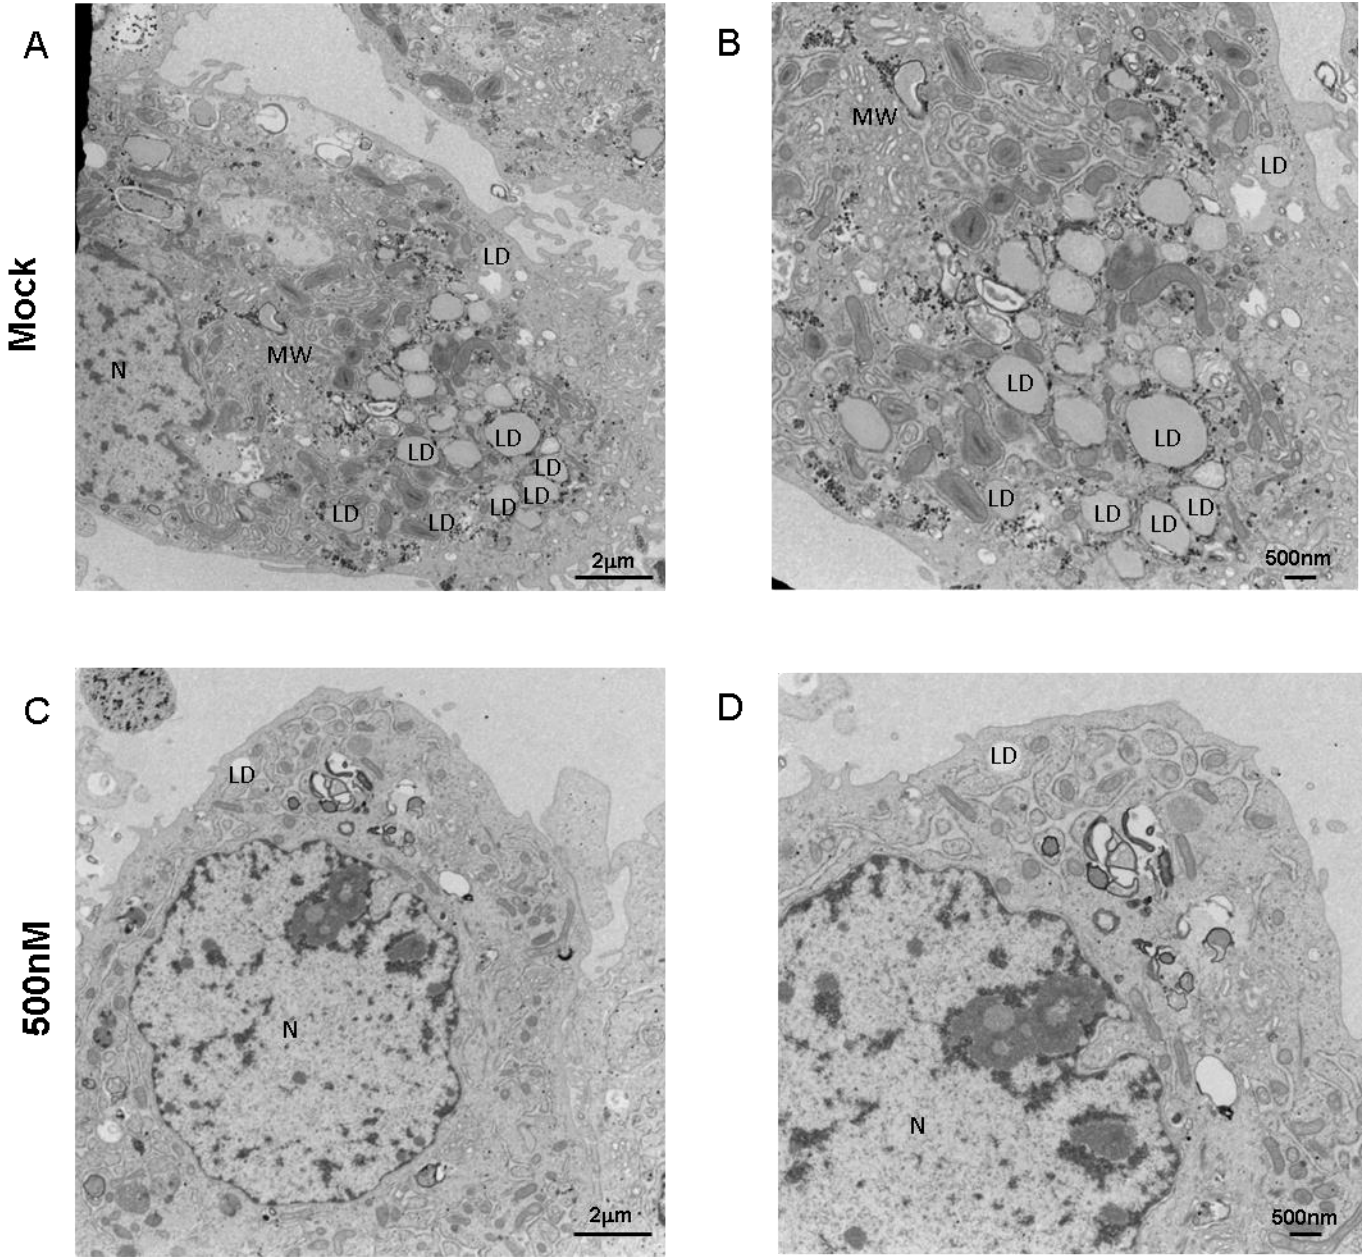

**Supplementary Figure S5: Electron microscopy shows that high dose treatment with inhibitor A reduces the appearance of membranous webs and the size and number of lipid droplets in Huh7-SGR cells.** Huh7-SGR cells treated for 96h with vehicle (DMSO) (a-b) or 500nM inhibitor A (c-d) were fixed and processed for EM. One representative cell is shown for each treatment at magnifications of 1500X (a,c) and 2500X (b,d) MW: membranous webs, LD: lipid droplets, N: nucleus

**Supplementary Table S1:** Palmitoleic acid or oleic acid treatment rescues SCD inhibitors' antiviral effect.

| Inhibitor | Structure                                                                           | Inhibition            |      |                | Rescue     |                         |                               |
|-----------|-------------------------------------------------------------------------------------|-----------------------|------|----------------|------------|-------------------------|-------------------------------|
|           |                                                                                     | EC <sub>50</sub> (nM) |      |                |            |                         |                               |
|           |                                                                                     | Gt1b                  | Gt1a | Gt1b<br>50%NHS | 10%<br>FBS | 100 μM<br>Oleic<br>acid | 100 μM<br>Palmitoleic<br>acid |
| C         | 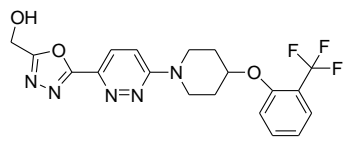   | 1.9                   | 0.74 | >40000         | 0.64       | 6382                    | 3442                          |
| D         |    | 0.9                   | 2.2  | >40000         |            |                         |                               |
| E         |   | 0.32                  | 0.90 | >40000         |            |                         |                               |
| F         |  | 12                    | 5.8  | >40000         | 6.4        | 14213                   | 10941                         |
| G         |  | 13                    | 25   | >40000         | 16         | >40000                  | >40000                        |
| H         |  | 8.3                   | 10   | >40000         |            |                         |                               |

**Supplementary Table S2:** SCD inhibitors' do not directly repress HCV NS3 protease and NS5B polymerase activity *in vitro*.

| Inhibitor | Structure                                                                           | NS3<br>EC <sub>50</sub> (nM) | NS5B<br>EC <sub>50</sub> (nM) |
|-----------|-------------------------------------------------------------------------------------|------------------------------|-------------------------------|
| C         | 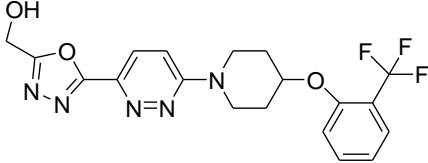   | >100000                      | 30064                         |
| E         |    | >100000                      | >80000                        |
| F         |   | >100000                      |                               |
| G         |  | >100000                      | 32423                         |
| H         |  | >100000                      | >80000                        |



## Supplementary Table S3: List of primers

| <b>Primer Name</b> | <b>Nucleotide Sequence</b> |
|--------------------|----------------------------|
| 18S rRNA FWD       | GCGATGCGGCGGCGTTATTC       |
| 18S rRNA REV       | CAATCTGTCAATCCTGTCCGTGTCC  |
| HCV IRES FWD       | GTCTGCGGAACCGGTGAGTA       |
| HCV IRES REV       | GCCCAAATCTCCAGGCATT        |
| JFH1 HCV IRES REV  | GCCCAAATGGCCGGGCATA        |
